# Supplementary material
Source: publisher site journal article supplement (https://www.spandidos-publications.com/5527/downloadSupplementary)
Supplement: Supplementary file 1 [file downloadSupplementary]

## Sheet: heatmap
						Table SIV. List of the proteins that involved in 18 functions and used for heatmap analysis.
No	log2(pCDH-SERPINA3/pCDH-NC)	Number	GO	Gene	Accession	Name	Description	pCDH-SERPINA3/pCDH-NC	Mol(kDa)	Length
1	1.39519	19	Regulation of biological process	RGS2	P41220	RGS2	Regulator of G-protein signaling 2	2.63023	24.382	211
2	0.537071			ZBTB1	Q9Y2K1	ZBTB1	Zinc finger and BTB domain-containing protein 1	1.45102	82.016	713
3	0.517858			HOXA13	P31271	HXA13	Homeobox protein Hox-A13	1.43183	39.727	388
4	0.36741			MNT	Q99583	MNT	Max-binding protein MNT	1.29003	62.3	582
5	0.119528			NUSAP1	Q9BXS6	NUSAP	Nucleolar and spindle-associated protein 1	1.08638	49.452	441
6	0.115216			ZC3HC1	Q86WB0	NIPA	Nuclear-interacting partner of ALK	1.08314	55.262	502
7	0.108858			ARHGEF7	Q14155	ARHG7	Rho guanine nucleotide exchange factor 7	1.07837	90.012	803
8	0.108572			TARBP2	Q15633	TRBP2	RISC-loading complex subunit TARBP2	1.07816	39.039	366
9	0.107785			NELFCD	Q8IXH7	NELFD	Negative elongation factor C/D	1.07757	66.247	590
10	0.106225			HTRA2	O43464	HTRA2	Serine protease HTRA2, mitochondrial	1.07641	48.841	458
11	0.0796383			ZC3H8	Q8N5P1	ZC3H8	Zinc finger CCCH domain-containing protein 8	1.05675	33.576	291
12	0.0648454			EHD1	Q9H4M9	EHD1	EH domain-containing protein 1	1.04597	60.627	534
13	-0.0407872			PTK2	Q05397	FAK1	Focal adhesion kinase 1	0.972124	119.233	1052
14	-0.0567373			PDIA3	P30101	PDIA3	Protein disulfide-isomerase A3	0.961436	56.782	505
15	-0.0607839			AJUBA	Q96IF1	AJUBA	LIM domain-containing protein ajuba	0.958743	56.934	538
16	-0.0773849			CDKN1C	P49918	CDN1C	Cyclin-dependent kinase inhibitor 1C	0.947774	32.177	316
17	-0.170932			CNPY2	Q9Y2B0	CNPY2	Protein canopy homolog 2	0.888269	20.652	182
18	-0.196337			LSM11	P83369	LSM11	U7 snRNA-associated Sm-like protein LSm11	0.872764	39.5	360
19	-6.10649			DENND4A	Q7Z401	MYCPP	C-myc promoter-binding protein	0.0145132	209.244	1863
20	0.902765	6	Immune	IFI30	P13284	GILT	Gamma-interferon-inducible lysosomal thiol reductase	1.86965	27.964	250
21	0.537071			ZBTB1	Q9Y2K1	ZBTB1	Zinc finger and BTB domain-containing protein 1	1.45102	82.016	713
22	0.440313			DCTN5	Q9BTE1	DCTN5	Dynactin subunit 5	1.3569	20.127	182
23	0.108572			TARBP2	Q15633	TRBP2	RISC-loading complex subunit TARBP2	1.07816	39.039	366
24	-0.0355301			LIG1	P18858	DNLI1	DNA ligase 1	0.975673	101.736	919
25	-0.0511903			SBDS	Q9Y3A5	SBDS	Ribosome maturation protein SBDS	0.96514	28.764	250
26	0.790025	7	Transport	PIKFYVE	Q9Y2I7	FYV1	1-phosphatidylinositol 3-phosphate 5-kinase	1.7291	237.136	2098
27	0.212495			ABCC3	O15438	MRP3	ATP-binding cassette sub-family C member 3	1.15869	169.343	1527
28	0.210223			ABCC5	O15440	MRP5	Multidrug resistance-associated protein 5	1.15687	160.66	1437
29	0.170793			VPS37B	Q9H9H4	VP37B	Vacuolar protein sorting-associated protein 37B	1.12568	31.307	285
30	0.135362			CASC3	O15234	CASC3	Protein CASC3	1.09837	76.278	703
31	0.0834842			EXOC6B	Q9Y2D4	EXC6B	Exocyst complex component 6B	1.05957	94.201	811
32	0.0278921			NUP188	Q5SRE5	NU188	Nucleoporin NUP188	1.01952	196.043	1749
33	0.882947	31	Metabolic process	APOBEC3C	Q9NRW3	ABC3C	DNA dC->dU-editing enzyme APOBEC-3C	1.84414	22.826	190
34	0.840714			CDC26	Q8NHZ8	CDC26	Anaphase-promoting complex subunit CDC26	1.79094	9.777	85
35	0.349032			GSK3A	P49840	GSK3A	Glycogen synthase kinase-3 alpha	1.27371	50.981	483
36	0.33152			MLXIP	Q9HAP2	MLXIP	MLX-interacting protein	1.25834	101.185	919
37	0.292569			DUSP9	Q99956	DUS9	Dual specificity protein phosphatase 9	1.22482	41.868	384
38	0.245904			MOCS2	O96007	MOC2B	Molybdopterin synthase catalytic subunit	1.18584	20.944	188
39	0.244632			ARFGAP3	Q9NP61	ARFG3	ADP-ribosylation factor GTPase-activating protein 3	1.18479	56.928	516
40	0.156176			ZFP91	Q96JP5	ZFP91	E3 ubiquitin-protein ligase ZFP91	1.11433	63.445	570
41	0.151028			GIT1	Q9Y2X7	GIT1	ARF GTPase-activating protein GIT1	1.11036	84.341	761
42	0.1145			VPS39	Q96JC1	VPS39	Vam6/Vps39-like protein	1.0826	101.809	886
43	0.107785			NELFCD	Q8IXH7	NELFD	Negative elongation factor C/D	1.07757	66.247	590
44	0.106225			HTRA2	O43464	HTRA2	Serine protease HTRA2, mitochondrial	1.07641	48.841	458
45	0.103871			ITCH	Q96J02	ITCH	E3 ubiquitin-protein ligase Itchy homolog	1.07465	102.803	903
46	0.0991027			REXO4	Q9GZR2	REXO4	RNA exonuclease 4	1.07111	46.672	422
47	0.0618354			NDUFA10	O95299	NDUAA	NADH dehydrogenase [ubiquinone] 1 alpha subcomplex subunit 10, mitochondrial	1.04379	40.751	355
48	-0.0355301			LIG1	P18858	DNLI1	DNA ligase 1	0.975673	101.736	919
49	-0.0645114			USP11	P51784	UBP11	Ubiquitin carboxyl-terminal hydrolase 11	0.956269	109.817	963
50	-0.0728183			PTS	Q03393	PTPS	6-pyruvoyl tetrahydrobiopterin synthase	0.950779	16.386	145
51	-0.0773849			CDKN1C	P49918	CDN1C	Cyclin-dependent kinase inhibitor 1C	0.947774	32.177	316
52	-0.0783605			EEF1B2	P24534	EF1B	Elongation factor 1-beta	0.947133	24.764	225
53	-0.0820238			OTUD5	Q96G74	OTUD5	OTU domain-containing protein 5	0.944731	60.626	571
54	-0.157483			COPS3	Q9UNS2	CSN3	COP9 signalosome complex subunit 3	0.896588	47.873	423
55	-0.170932			CNPY2	Q9Y2B0	CNPY2	Protein canopy homolog 2	0.888269	20.652	182
56	-0.174071			PGS1	Q32NB8	PGPS1	CDP-diacylglycerol--glycerol-3-phosphate 3-phosphatidyltransferase, mitochondrial	0.886338	62.73	556
57	-0.190734			SIRT3	Q9NTG7	SIR3	NAD-dependent protein deacetylase sirtuin-3, mitochondrial	0.87616	43.573	399
58	-0.274035			TSEN15	Q8WW01	SEN15	tRNA-splicing endonuclease subunit Sen15	0.827003	18.641	171
59	-0.290055			RNF8	O76064	RNF8	E3 ubiquitin-protein ligase RNF8	0.817871	55.518	485
60	-0.428174			POLE3	Q9NRF9	DPOE3	DNA polymerase epsilon subunit 3	0.743202	16.86	147
61	-0.472779			ASTE1	Q2TB18	ASTE1	Protein asteroid homolog 1	0.720575	77.093	679
62	-0.921243			USP38	Q8NB14	UBP38	Ubiquitin carboxyl-terminal hydrolase 38	0.528054	116.546	1042
63	-6.10649			DENND4A	Q7Z401	MYCPP	C-myc promoter-binding protein	0.014513	209.244	1863
64	0.0323553	3	Cell cycle	PHGDH	O43175	SERA	D-3-phosphoglycerate dehydrogenase	1.02268	56.651	533
65	0.119528			NUSAP1	Q9BXS6	NUSAP	Nucleolar and spindle-associated protein 1	1.08638	49.452	441
66	-0.196337			LSM11	P83369	LSM11	U7 snRNA-associated Sm-like protein LSm11	0.872764	39.5	360
67	0.32215	3	Cell death	ABR	Q12979	ABR	Active breakpoint cluster region-related protein	1.25019	97.598	859
68	0.106225			HTRA2	O43464	HTRA2	Serine protease HTRA2, mitochondrial	1.07641	48.841	458
69	-0.218332			SGPL1	O95470	SGPL1	Sphingosine-1-phosphate lyase 1	0.859558	63.524	568
70	0.902765	5	Signal transduction	IFI30	P13284	GILT	Gamma-interferon-inducible lysosomal thiol reductase	1.86965	27.964	250
71	0.32215			ABR	Q12979	ABR	Active breakpoint cluster region-related protein	1.25019	97.598	859
72	0.0942928			RASSF8	Q8NHQ8	RASF8	Ras association domain-containing protein 8	1.06754	48.327	419
73	-0.218332			SGPL1	O95470	SGPL1	Sphingosine-1-phosphate lyase 1	0.859558	63.524	568
74	1.39519	11	Response to stimulus	RGS2	P41220	RGS2	Regulator of G-protein signaling 2	2.63023	24.382	211
75	0.902765			IFI30	P13284	GILT	Gamma-interferon-inducible lysosomal thiol reductase	1.86965	27.964	250
76	0.36741			MNT	Q99583	MNT	Max-binding protein MNT	1.29003	62.3	582
77	0.115216			ZC3HC1	Q86WB0	NIPA	Nuclear-interacting partner of ALK	1.08314	55.262	502
78	0.108572			TARBP2	Q15633	TRBP2	RISC-loading complex subunit TARBP2	1.07816	39.039	366
79	0.106225			HTRA2	O43464	HTRA2	Serine protease HTRA2, mitochondrial	1.07641	48.841	458
80	-0.0567373			PDIA3	P30101	PDIA3	Protein disulfide-isomerase A3	0.961436	56.782	505
81	-0.0957979			CTSL	P07711	CATL1	Procathepsin L	0.935755	37.564	333
82	-0.0957979			CTSL	P07711	CATL1	Procathepsin L	0.935755	37.564	333
83	-0.117622			ITPR2	Q14571	ITPR2	Inositol 1,4,5-trisphosphate receptor type 2	0.921706	308.064	2701
84	-0.173725			AACS	Q86V21	AACS	Acetoacetyl-CoA synthetase	0.88655	75.144	672
85	0.24322	3	Localization	POLR2M	Q6EEV4	GL1AD	DNA-directed RNA polymerase II subunit GRINL1A, isoforms 4/5	1.18363	15.131	148
86	0.0834842			EXOC6B	Q9Y2D4	EXC6B	Exocyst complex component 6B	1.05957	94.201	811
87	-0.187135			SYNE2	Q8WXH0	SYNE2	Nesprin-2	0.878348	796.442	6885
88	1.01408	21	Biogenesis and organism process	HOXA11	P31270	HXA11	Homeobox protein Hox-A11	2.01961	34.486	313
89	0.537071			ZBTB1	Q9Y2K1	ZBTB1	Zinc finger and BTB domain-containing protein 1	1.45102	82.016	713
90	0.236865			FAM107B	Q9H098	F107B	Protein FAM107B	1.17843	15.558	131
91	0.12333			ALDH5A1	P51649	SSDH	Succinate-semialdehyde dehydrogenase, mitochondrial	1.08925	57.215	535
92	0.115574			KPNA6	O60684	IMA7	Importin subunit alpha-7	1.08341	60.03	536
93	0.108858			ARHGEF7	Q14155	ARHG7	Rho guanine nucleotide exchange factor 7	1.07837	90.012	803
94	0.101378			EXOC8	Q8IYI6	EXOC8	Exocyst complex component 8	1.0728	81.799	725
95	0.087388			PEX14	O75381	PEX14	Peroxisomal membrane protein PEX14	1.06244	41.237	377
96	0.0720608			TBCD	Q9BTW9	TBCD	Tubulin-specific chaperone D	1.05122	132.6	1192
97	0.0587437			DBNL	Q9UJU6	DBNL	Drebrin-like protein	1.04156	48.207	430
98	-0.0355301			LIG1	P18858	DNLI1	DNA ligase 1	0.975673	101.736	919
99	-0.0511903			SBDS	Q9Y3A5	SBDS	Ribosome maturation protein SBDS	0.96514	28.764	250
100	-0.0772293			TTL	Q8NG68	TTL	Tubulin--tyrosine ligase	0.947876	43.212	377
101	-0.174278			HSPB11	Q9Y547	IFT25	Intraflagellar transport protein 25 homolog	0.886211	16.297	144
102	-0.177813			ODF2	Q5BJF6	ODFP2	Outer dense fiber protein 2	0.884042	95.401	829
103	-0.187135			SYNE2	Q8WXH0	SYNE2	Nesprin-2	0.878348	796.442	6885
104	-0.231737			CENPH	Q9H3R5	CENPH	Centromere protein H	0.851609	28.481	247
105	-0.234145			SHKBP1	Q8TBC3	SHKB1	SH3KBP1-binding protein 1	0.850189	76.344	707
106	-0.688547			VMP1	Q96GC9	VMP1	Vacuole membrane protein 1	0.620478	46.238	406
107	-0.688547			VMP1	Q96GC9	VMP1	Vacuole membrane protein 1	0.620478	46.238	406
108	-11.9853			CCT6B	Q92526	TCPW	T-complex protein 1 subunit zeta-2	0.000246633	57.821	530
109	4.026	16	Catabolic proces	SPOP	O43791	SPOP	Speckle-type POZ protein	16.291	42.132	374
110	0.349032			GSK3A	P49840	GSK3A	Glycogen synthase kinase-3 alpha	1.27371	50.981	483
111	0.244632			ARFGAP3	Q9NP61	ARFG3	ADP-ribosylation factor GTPase-activating protein 3	1.18479	56.928	516
112	0.151028			GIT1	Q9Y2X7	GIT1	ARF GTPase-activating protein GIT1	1.11036	84.341	761
113	0.1145			VPS39	Q96JC1	VPS39	Vam6/Vps39-like protein	1.0826	101.809	886
114	0.106728			TXNRD2	Q9NNW7	TRXR2	Thioredoxin reductase 2, mitochondrial	1.07678	56.507	524
115	0.106225			HTRA2	O43464	HTRA2	Serine protease HTRA2, mitochondrial	1.07641	48.841	458
116	-0.0706946			PTGES2	Q9H7Z7	PGES2	Prostaglandin E synthase 2	0.952179	41.943	377
117	-0.0728183			PTS	Q03393	PTPS	6-pyruvoyl tetrahydrobiopterin synthase	0.950779	16.386	145
118	-0.0773849			CDKN1C	P49918	CDN1C	Cyclin-dependent kinase inhibitor 1C	0.947774	32.177	316
119	-0.0833932			QSOX2	Q6ZRP7	QSOX2	Sulfhydryl oxidase 2	0.943835	77.529	698
120	-0.0848467			IVD	P26440	IVD	Isovaleryl-CoA dehydrogenase, mitochondrial	0.942885	46.651	426
121	-0.109938			UQCRB	P14927	QCR7	Cytochrome b-c1 complex subunit 7	0.926628	13.53	111
122	-0.120806			HCCS	P53701	CCHL	Holocytochrome c-type synthase	0.919674	30.602	268
123	-0.146744			BCKDHB	P21953	ODBB	2-oxoisovalerate dehydrogenase subunit beta, mitochondrial	0.903287	43.123	392
124	-6.10649			DENND4A	Q7Z401	MYCPP	C-myc promoter-binding protein	0.0145132	209.244	1863
126	8.55167	16	Nucleolus	SMAGP	Q0VAQ4	SMAGP	Small cell adhesion glycoprotein	375.241	10.679	97
127	5.57912			GPSM2	P81274	GPSM2	G-protein-signaling modulator 2	47.806	76.662	684
128	4.27774			BRCA2	P51587	BRCA2	Breast cancer type 2 susceptibility protein	19.3967	384.202	3418
129	0.193307			KIF18B	Q86Y91	KI18B	Kinesin-like protein KIF18B	1.14338	93.011	852
130	0.167531			VRK1	Q99986	VRK1	Serine/threonine-protein kinase VRK1	1.12313	45.476	396
131	0.125321			NUP35	Q8NFH5	NUP35	Nucleoporin NUP35	1.09075	34.774	326
132	0.11725			TTC5	Q8N0Z6	TTC5	Tetratricopeptide repeat protein 5	1.08467	48.928	440
133	0.110505			RNF169	Q8NCN4	RN169	E3 ubiquitin-protein ligase RNF169	1.07961	77.194	708
134	-0.0409515			PRPF6	O94906	PRP6	Pre-mRNA-processing factor 6	0.972014	106.925	941
135	-0.0561126			SUPT5H	O00267	SPT5H	Transcription elongation factor SPT5	0.961852	121	1087
136	-0.0682499			SCAF8	Q9UPN6	SCAF8	SR-related and CTD-associated factor 8	0.953794	140.519	1271
137	-0.0903716			FOXK2	Q00167	FOXK2	Forkhead box protein K2	0.939281	69.062	660
138	-0.0916028			SNRPB2	P08579	RU2B	U2 small nuclear ribonucleoprotein B''	0.93848	25.486	225
139	-0.0960634			SAFB	Q15424	SAFB1	Scaffold attachment factor B1	0.935582	102.642	915
140	-0.100214			BAP1	Q92560	BAP1	Ubiquitin carboxyl-terminal hydrolase BAP1	0.932894	80.362	729
141	-0.146477			SETDB1	Q15047	SETB1	Histone-lysine N-methyltransferase SETDB1	0.903454	143.157	1291
142	0.632955	11	Protein complex	CIR1	Q86X95	CIR1	Corepressor interacting with RBPJ 1	1.55074	52.313	450
143	0.270095			CEP170B	Q9Y4F5	C170B	Centrosomal protein of 170 kDa protein B	1.20589	171.688	1589
144	0.148626			SLAIN2	Q9P270	SLAI2	SLAIN motif-containing protein 2	1.10851	62.543	581
145	0.127967			DNAJA3	Q96EY1	DNJA3	DnaJ homolog subfamily A member 3, mitochondrial	1.09275	52.489	480
146	0.0457708			COG5	Q9UP83	COG5	Conserved oligomeric Golgi complex subunit 5	1.03223	92.743	839
147	0.0365239			SENP3	Q9H4L4	SENP3	Sentrin-specific protease 3	1.02564	65.01	574
148	-0.0836044			TBL1X	O60907	TBL1X	F-box-like/WD repeat-containing protein TBL1X	0.943697	62.496	577
149	-0.101463			HAUS3	Q68CZ6	HAUS3	HAUS augmin-like complex subunit 3	0.932087	69.65	603
150	-0.126414			INTS4	Q96HW7	INT4	Integrator complex subunit 4	0.916106	108.171	963
151	-0.126414			INTS4	Q96HW7	INT4	Integrator complex subunit 4	0.916106	108.171	963
152	-0.836895			CPLX1	O14810	CPLX1	Complexin-1	0.559847	15.03	134
153	0.346965	9	Cytoplasm	SNX18	Q96RF0	SNX18	Sorting nexin-18	1.27188	68.894	628
154	0.339804			AMOTL2	Q9Y2J4	AMOL2	Angiomotin-like protein 2	1.26558	85.764	779
155	0.093307			SLC4A1AP	Q9BWU0	NADAP	Kanadaptin	1.06681	88.814	796
156	0.0731726			VPS53	Q5VIR6	VPS53	Vacuolar protein sorting-associated protein 53 homolog	1.05203	94.405	832
157	0.0497935			CMC2	Q9NRP2	COXM2	COX assembly mitochondrial protein 2 homolog	1.03512	9.46	79
158	0.0457708			COG5	Q9UP83	COG5	Conserved oligomeric Golgi complex subunit 5	1.03223	92.743	839
159	-0.0635227			CALU	O43852	CALU	Calumenin	0.956925	37.107	315
160	-0.119411			SPATA5L1	Q9BVQ7	SPA5L	Spermatogenesis-associated protein 5-like protein 1	0.920563	80.71	753
161	-0.836895			CPLX1	O14810	CPLX1	Complexin-1	0.559847	15.03	134
162	0.106037	5	Membrane part	TMEM214	Q6NUQ4	TM214	Transmembrane protein 214	1.07627	77.151	689
163	0.079933			LRRC8D	Q7L1W4	LRC8D	Volume-regulated anion channel subunit LRRC8D	1.05697	98.201	858
164	-0.22046			TMEM223	A0PJW6	TM223	Transmembrane protein 223	0.858292	22.049	202
165	-0.668931			TMEM62	Q0P6H9	TMM62	Transmembrane protein 62	0.628973	73.133	643
166	-0.836895			CPLX1	O14810	CPLX1	Complexin-1	0.559847	15.03	134
167	6.65525	24	Extracellular vesicular exosome	LPO	P22079	PERL	Lactoperoxidase	100.793	80.288	712
168	3.82551			SLC2A3	P11169	GTR3	Solute carrier family 2, facilitated glucose transporter member 3	14.1773	53.924	496
169	0.781804			KRT72	Q14CN4	K2C72	Keratin, type II cytoskeletal 72	1.71928	55.877	511
170	0.322799			OCRL	Q01968	OCRL	Inositol polyphosphate 5-phosphatase OCRL	1.25075	104.205	901
171	0.112686			CCT6A	P40227	TCPZ	T-complex protein 1 subunit zeta	1.08124	58.024	531
172	0.110858			RND3	P61587	RND3	Rho-related GTP-binding protein RhoE	1.07987	27.368	244
173	0.0775661			GNAQ	P50148	GNAQ	Guanine nucleotide-binding protein G(q) subunit alpha	1.05524	42.142	359
174	0.0594358			PRRC2A	P48634	PRC2A	Protein PRRC2A	1.04206	228.863	2157
175	0.0546125			ALDH1L2	Q3SY69	AL1L2	Mitochondrial 10-formyltetrahydrofolate dehydrogenase	1.03858	101.746	923
176	0.0385485			PDCD2	Q16342	PDCD2	Programmed cell death protein 2	1.02708	38.592	344
177	-0.0530416			ACO1	P21399	ACOC	Cytoplasmic aconitate hydratase	0.963902	98.399	889
178	-0.0607473			PLS1	Q14651	PLSI	Plastin-1	0.958767	70.253	629
179	-0.0661234			RPL30	P62888	RL30	60S ribosomal protein L30	0.955201	12.784	115
180	-0.0700466			MDH1	P40925	MDHC	Malate dehydrogenase, cytoplasmic	0.952607	36.426	334
181	-0.080965			CKB	P12277	KCRB	Creatine kinase B-type	0.945425	42.644	381
182	-0.0984631			GLOD4	Q9HC38	GLOD4	Glyoxalase domain-containing protein 4	0.934027	34.793	313
183	-0.121431			PGAM1	P18669	PGAM1	Phosphoglycerate mutase 1	0.919276	28.804	254
184	-0.145914			CTSZ	Q9UBR2	CATZ	Cathepsin Z	0.903806	33.868	303
185	-0.167834			COMT	P21964	COMT	Catechol O-methyltransferase	0.890178	30.037	271
186	-0.247212			PNPO	Q9NVS9	PNPO	Pyridoxine-5'-phosphate oxidase	0.842523	29.988	261
187	-0.256372			RBBP9	O75884	RBBP9	Serine hydrolase RBBP9	0.837191	21	186
188	-0.260984			STX2	P32856	STX2	Syntaxin-2	0.834518	33.341	288
189	-0.333734			DES	P17661	DESM	Desmin	0.79348	53.536	470
190	-0.622527			PLCG2	P16885	PLCG2	1-phosphatidylinositol 4,5-bisphosphate phosphodiesterase gamma-2	0.649532	147.87	1265
192	4.51497	19	Binding	ZSCAN12	O43309	ZSC12	Zinc finger and SCAN domain-containing protein 12	22.8635	70.222	604
193	0.397842			PATZ1	Q9HBE1	PATZ1	POZ-, AT hook-, and zinc finger-containing protein 1	1.31754	74.06	687
194	0.396569			GPATCH11	Q8N954	GPT11	G patch domain-containing protein 11	1.31637	33.277	285
195	0.226988			ZFAND1	Q8TCF1	ZFAN1	AN1-type zinc finger protein 1	1.17039	30.787	268
196	0.199374			ZNF148	Q9UQR1	ZN148	Zinc finger protein 148	1.1482	88.976	794
197	0.180667			SUZ12	Q15022	SUZ12	Polycomb protein SUZ12	1.13341	83.055	739
198	0.163927			PURA	Q00577	PURA	Transcriptional activator protein Pur-alpha	1.12033	34.911	322
199	0.122762			INTS10	Q9NVR2	INT10	Integrator complex subunit 10	1.08882	82.236	710
200	0.112957			KLHDC4	Q8TBB5	KLDC4	Kelch domain-containing protein 4	1.08144	57.892	520
201	0.0940595			NIF3L1	Q9GZT8	NIF3L	NIF3-like protein 1	1.06737	41.968	377
202	-0.0774742			PSIP1	O75475	PSIP1	PC4 and SFRS1-interacting protein	0.947715	60.103	530
203	-0.198407			FBXO4	Q9UKT5	FBX4	F-box only protein 4	0.871512	44.136	387
204	-0.24044			UXS1	Q8NBZ7	UXS1	UDP-glucuronic acid decarboxylase 1	0.846487	47.577	420
205	-0.24044			UXS1	Q8NBZ7	UXS1	UDP-glucuronic acid decarboxylase 1	0.846487	47.577	420
206	-0.24044			UXS1	Q8NBZ7	UXS1	UDP-glucuronic acid decarboxylase 1	0.846487	47.577	420
207	-0.247972			NTHL1	P78549	NTH	Endonuclease III-like protein 1	0.84208	34.39	312
208	-0.44177			TAF13	Q15543	TAF13	Transcription initiation factor TFIID subunit 13	0.736231	14.287	124
209	-0.734933			NUDT12	Q9BQG2	NUD12	NAD-capped RNA hydrolase NUDT12	0.600846	52.076	462
210	-2.96578			RASSF3	Q86WH2	RASF3	Ras association domain-containing protein 3	0.128	27.562	238
211	0.17241	8	Enzymatic activity	HSPB8	Q9UJY1	HSPB8	Heat shock protein beta-8	1.12694	21.604	196
212	0.138358			TAF9	Q16594	TAF9	Transcription initiation factor TFIID subunit 9	1.10065	28.974	264
213	0.0643017			MALT1	Q9UDY8	MALT1	Mucosa-associated lymphoid tissue lymphoma translocation protein 1	1.04558	92.272	824
214	-0.0644654			CYP2S1	Q96SQ9	CP2S1	Cytochrome P450 2S1	0.9563	55.817	504
215	-0.0735609			LPCAT4	Q643R3	LPCT4	Lysophospholipid acyltransferase LPCAT4	0.95029	57.219	524
216	-0.0748561			STT3A	P46977	STT3A	Dolichyl-diphosphooligosaccharide--protein glycosyltransferase subunit STT3A	0.949437	80.53	705
217	-0.308011			CHPF	Q8IZ52	CHSS2	Chondroitin sulfate synthase 2	0.807754	85.467	775
218	-5.83116			SGMS2	Q8NHU3	SMS2	Phosphatidylcholine:ceramide cholinephosphotransferase 2	0.0175649	42.28	365
